# Supplementary material for: Influence of Densification on the Pyrolytic Behavior of Agricultural Biomass Waste and the Characteristics of Pyrolysis Products
Source: MDPI journal article supplement (doi:10.3390/en15124257), 2022-06-09
Supplement: s1 [file s1]

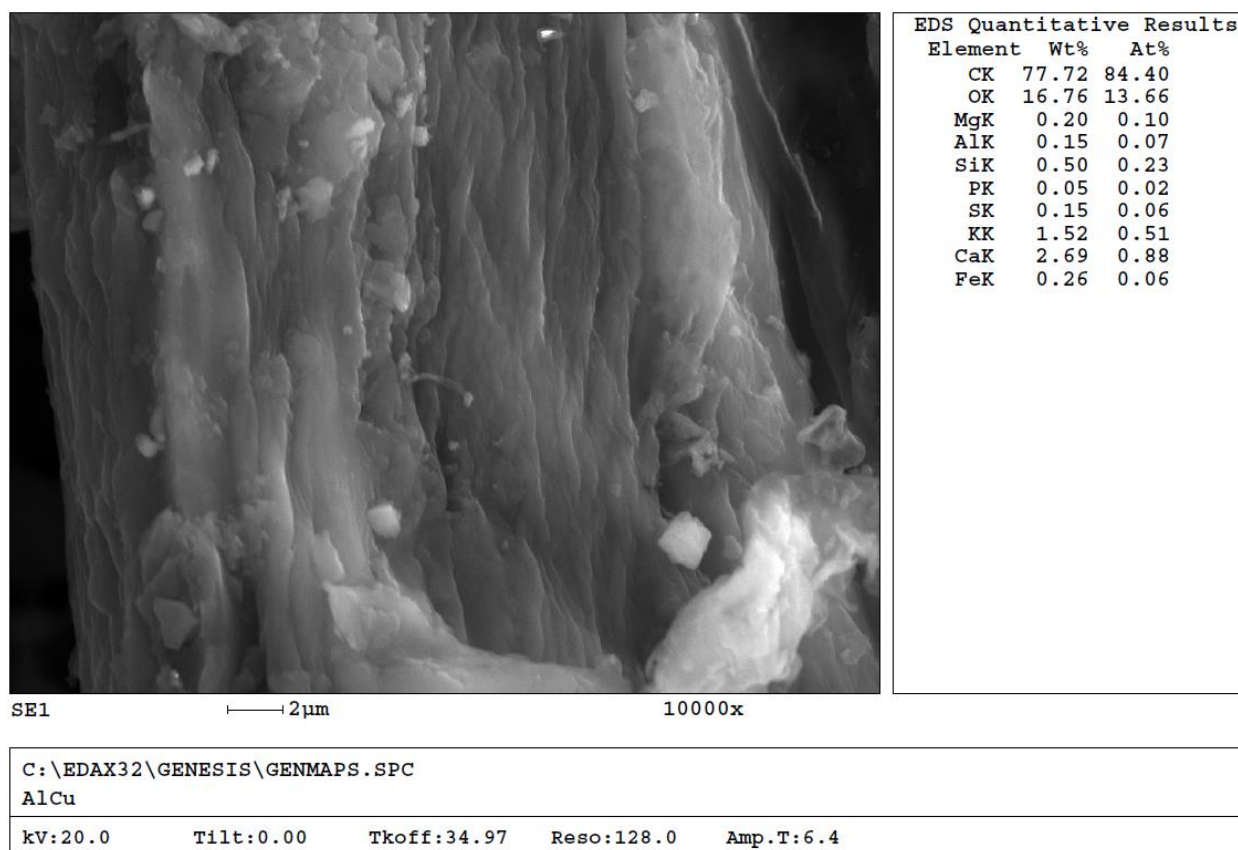

**Figure S1.** Results of microanalysis of SWL sample.

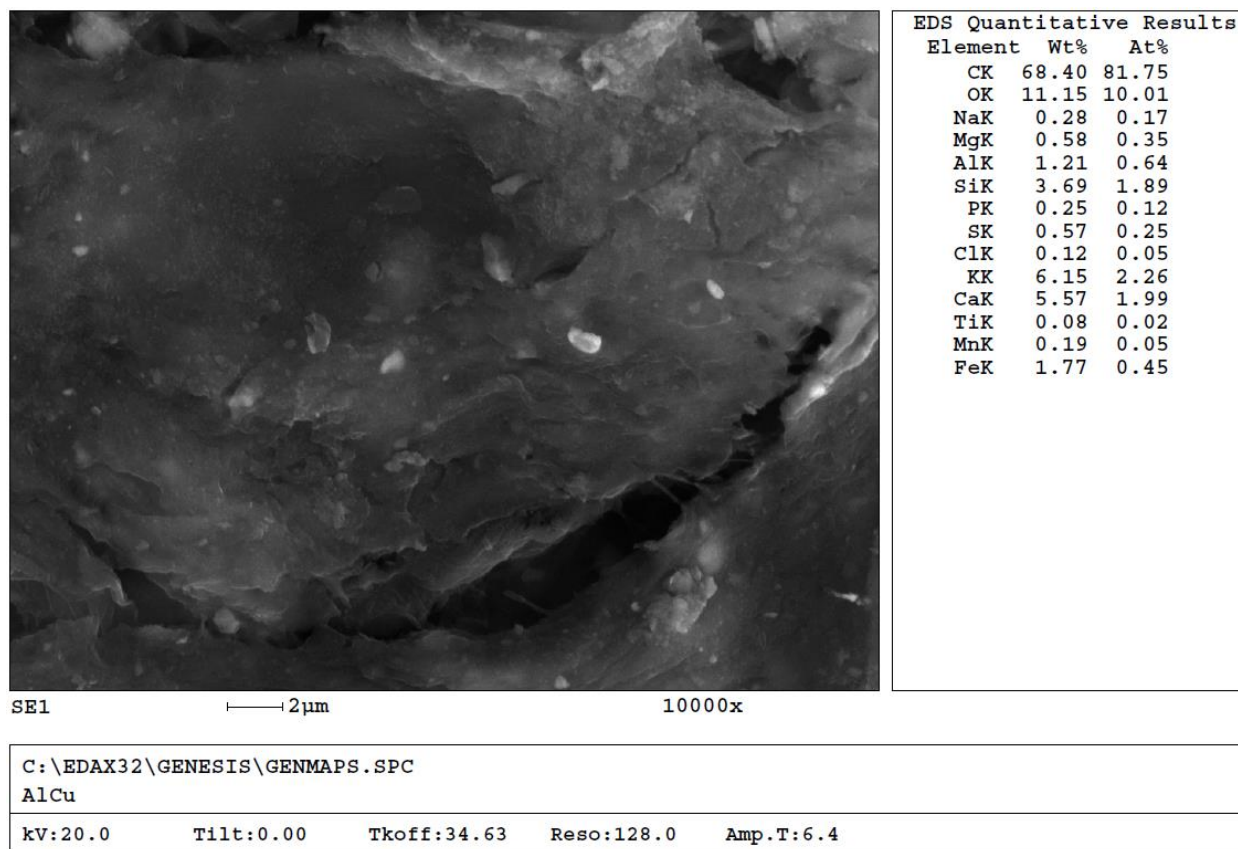

**Figure S2.** Results of microanalysis of the surface of SWD sample.

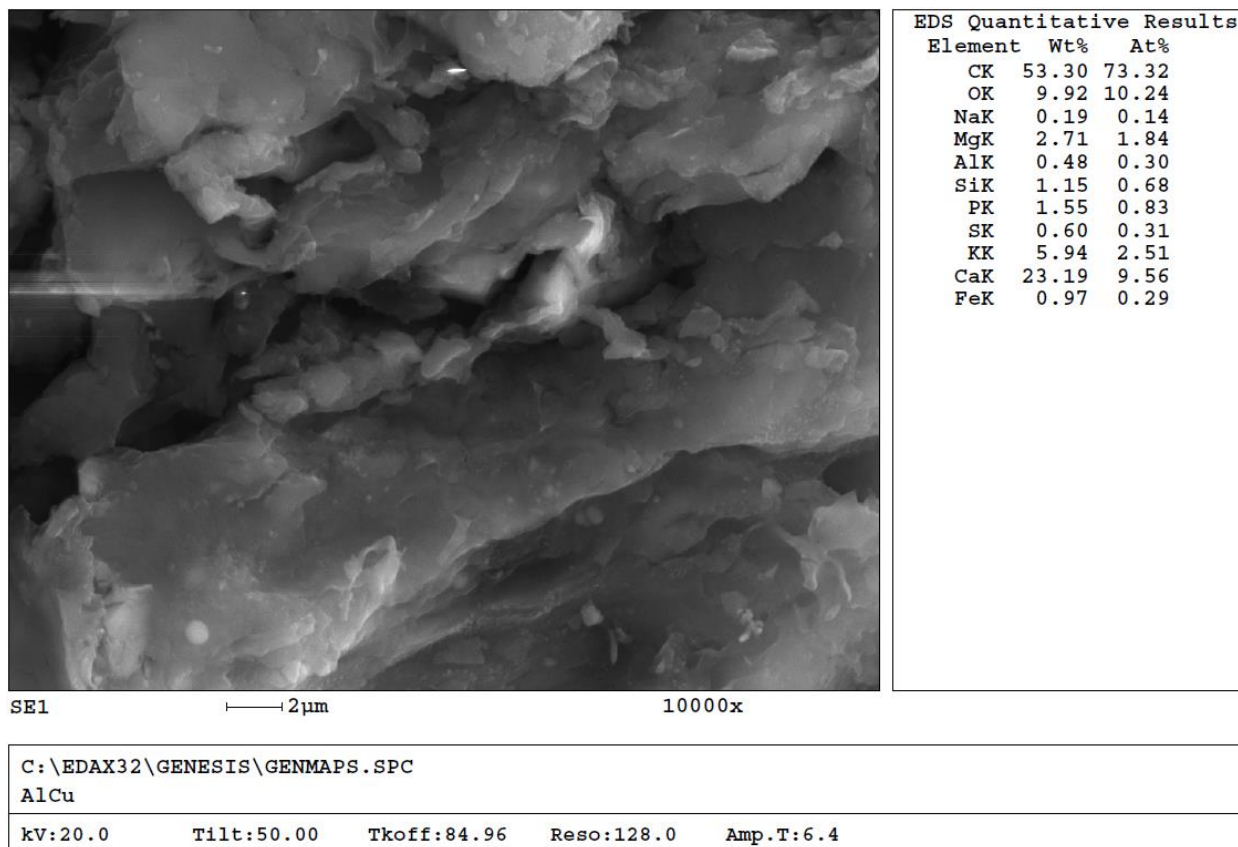

**Figure S3.** Results of microanalysis of the inside of SWD sample.

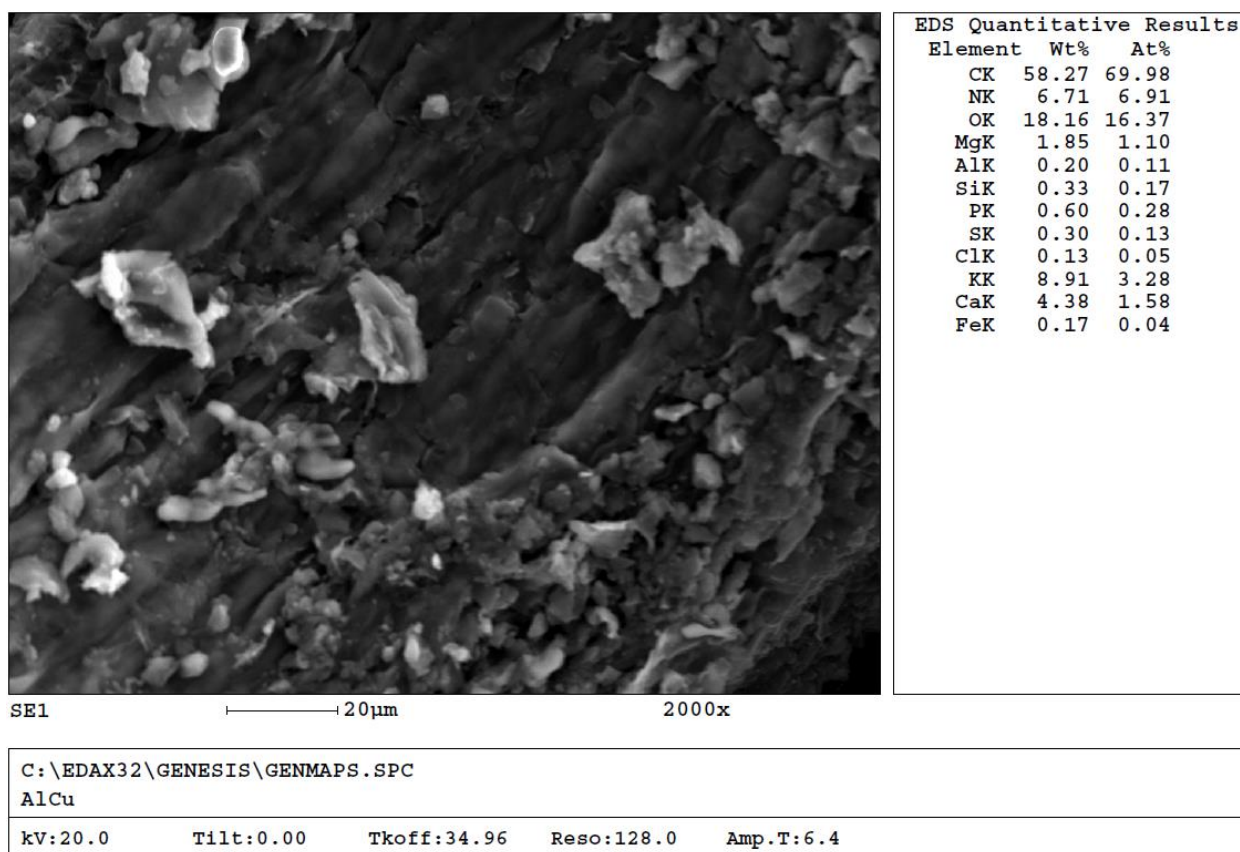

**Figure S4.** Results of microanalysis of SHL sample.

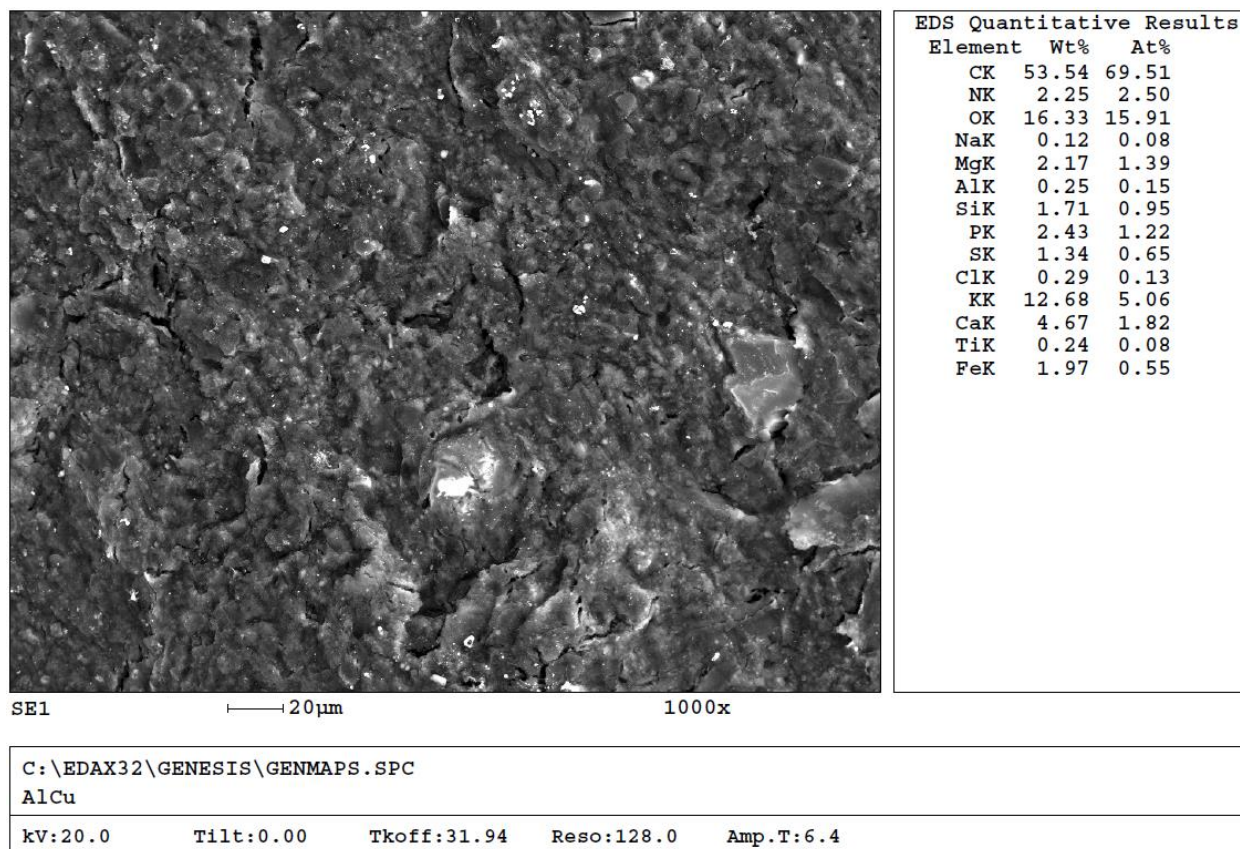

**Figure S5.** Results of microanalysis of the surface of SHD sample.



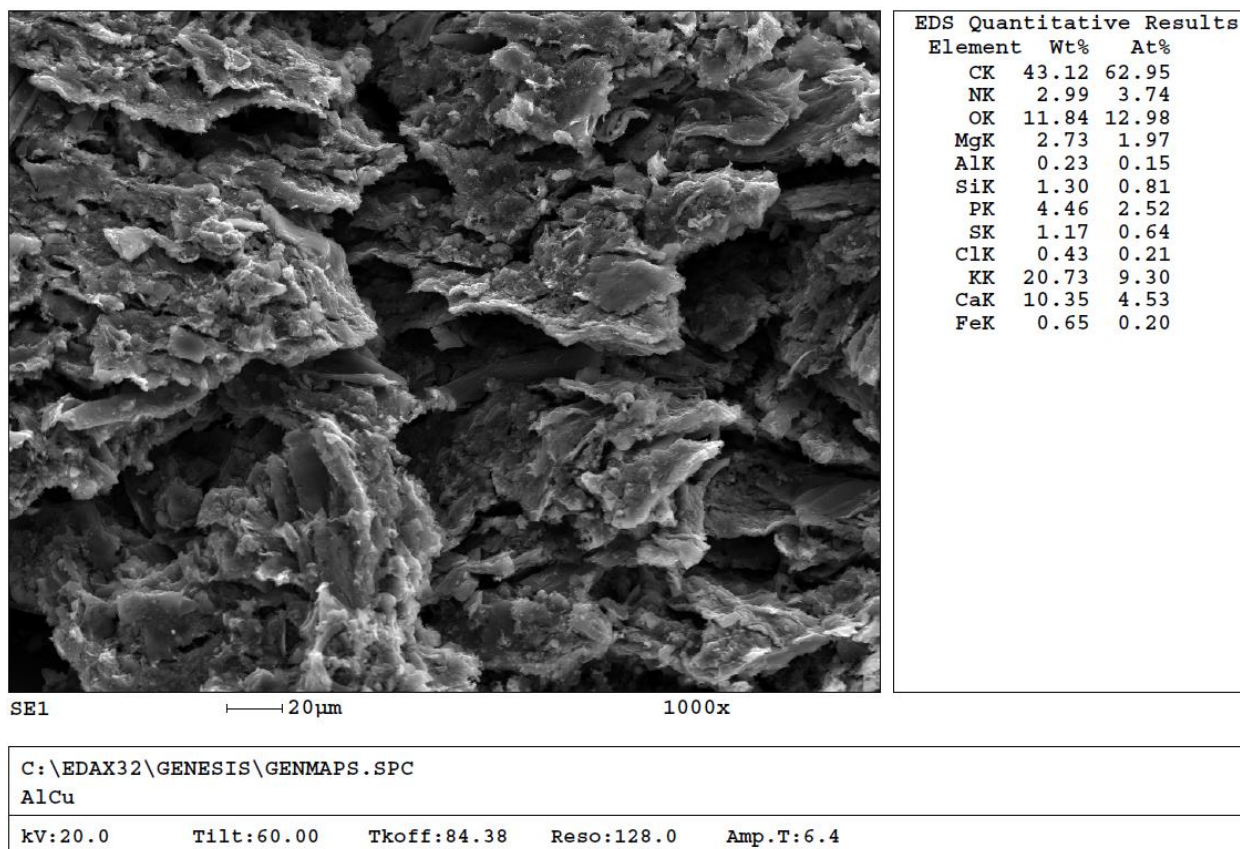

**Figure S6.** Results of microanalysis of the inside of SHD sample.
