# Supplementary material for: Influence of Densification on the Pyrolytic Behavior of Agricultural Biomass Waste and the Characteristics of Pyrolysis Products
Source: MDPI journal article supplement (doi:10.3390/en15124257), 2022-06-09
Supplement: s1 [file s1]

Archive with 1 entries (1 files):
- energies-1759183-supplementary.pdf
